# Supplementary material for: TO/TMMP-TMTGE Double-Healing Composite Containing a Transesterification Reversible Matrix and Tung Oil-Loaded Microcapsules for Active Self-Healing
Source: Polymers (Basel). 2019 Jul 2;11(7):1127. doi: 10.3390/polym11071127 (PMC6680642; doi:10.3390/polym11071127)
Supplement: Supplementary file 1 [file polymers-11-01127-s001.pdf]

## *Supporting Information*

### **TO/TMMP-TMTGE Double-Healing Composite Containing a Transesterification Reversible Matrix and Tung Oil-Loaded Microcapsules for Active Self-Healing**

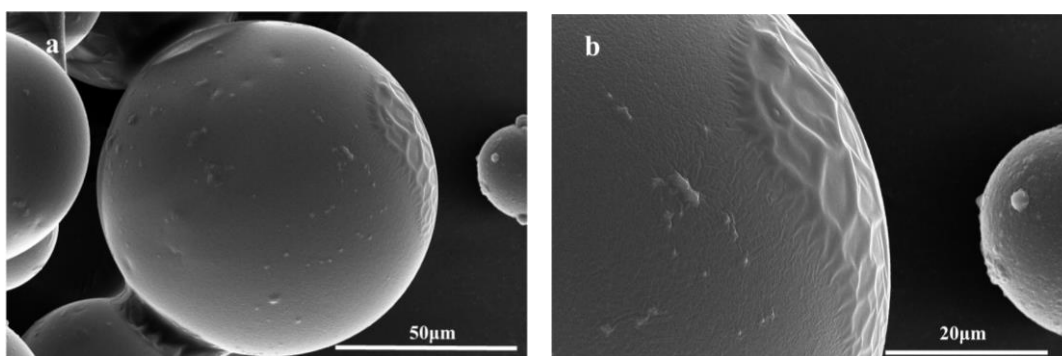

Figure 1. The SEM images of (a), (b) TO-loaded microcapsules (core/shell ratio of 4:1) at different magnifications.

The core content of the TO-loaded microcapsules was calculated based on the TGA data ( Figure 5):

As for TO-loaded microcapsules, weight losses include whole core material and partial shell material. It can be seen from the TGA curve of TO core material, TO completely decomposed at 464.5 °C (defined as a residual 5 wt%). However, at this temperature, shells and microcapsules both have not finished decomposition. As a result, core mass fraction for each of microcapsules with different core/shell ratios can be calculated as weight fraction difference between shells and microcapsules at 464.5°C approximately. By referring to Reviewer 52, 54, the core fraction of microcapsules of 2:1, 3:1, 4:1 was observed to be 41.95%, 58.91%, and 38.77%, respectively, which were marked in Figure 5.

The core content of TO-loaded microcapsules ( $W_c$ ) was calculated by the following formula.

$$W_c = W_m - W_s$$

Where  $W_m$ ,  $W_s$  is the weight fraction of microcapsules and shell when TO core is completely decomposed (464.5°C), respectively.

Table 1. Electrochemical parameters for TO/TMMP-TMTGE and TMMP-TMTGE self-healing coating materials obtained from EIS curves.

| Sample                              | $R_{coat}$<br>( $\Omega \cdot cm^2$ ) | $Q_{coat}$<br>( $\Omega^{-1} \cdot cm^{-2} \cdot s^n$ ) | $n_1$  | $Q_{dl}$<br>( $\Omega^{-1} \cdot cm^{-2} \cdot s^n$ ) | $n_2$  | $R_{cT}$<br>( $\Omega \cdot cm^2$ ) |
|-------------------------------------|---------------------------------------|---------------------------------------------------------|--------|-------------------------------------------------------|--------|-------------------------------------|
| TO/TMMP-TMTGE<br>(Original state)   | $6.43 \times 10^4$                    | $1.115 \times 10^{-5}$                                  | 0.4868 |                                                       |        |                                     |
| TO/TMMP-TMTGE<br>(After scratching) | $1.341 \times 10^4$                   | $4.091 \times 10^{-5}$                                  | 0.277  | $1.697 \times 10^{-5}$                                | 0.8145 | $1.448 \times 10^4$                 |
| TO/TMMP-TMTGE<br>(After healing)    | $6.243 \times 10^4$                   | $1.643 \times 10^{-5}$                                  | 0.4261 |                                                       |        |                                     |
| TMMP-TMTGE<br>(Original state)      | $2.059 \times 10^4$                   | $1.556 \times 10^{-5}$                                  | 0.7126 |                                                       |        |                                     |
| TMMP-TMTGE<br>(After scratching)    | $6.440 \times 10^3$                   | $5.936 \times 10^{-4}$                                  | 0.8341 | $9.661 \times 10^{-5}$                                | 0.4299 | $4.891 \times 10^3$                 |
| TMMP-TMTGE<br>(After healing)       | $2.012 \times 10^4$                   | $3.39 \times 10^{-5}$                                   | 0.3205 |                                                       |        |                                     |

Table S2 Electrochemical parameters for TO/TMMP-TMTGE and TMMP-TMTGE self-healing materials from Tafel curves

| Sample                              | $U_{\text{corr}}$ (V) | $I_{\text{corr}}$ ( $\text{A} \cdot \text{cm}^{-2}$ ) |
|-------------------------------------|-----------------------|-------------------------------------------------------|
| TO/TMMP-TMTGE<br>(Original state)   | 0.0650                | $2.9621 \times 10^{-6}$                               |
| TO/TMMP-TMTGE<br>(After scratching) | -0.2762               | $8.9207 \times 10^{-6}$                               |
| TO/TMMP-TMTGE<br>(After healing)    | -0.0284               | $4.0785 \times 10^{-6}$                               |
| TMMP-TMTGE<br>(Original state)      | -0.0671               | $5.9320 \times 10^{-6}$                               |
| TMMP-TMTGE<br>(After scratching)    | -0.3266               | $1.1064 \times 10^{-5}$                               |
| TMMP-TMTGE<br>(After healing)       | -0.1105               | $9.0012 \times 10^{-6}$                               |
